# Supplementary material for: Adlercreutzia equolifaciens Is an Anti-Inflammatory Commensal Bacterium with Decreased Abundance in Gut Microbiota of Patients with Metabolic Liver Disease
Source: MDPI journal article supplement (doi:10.3390/ijms241512232), 2023-07-31
Supplement: s1 [file s1]

| bioproject | project_alias | sample_accession | country | group           |
|------------|---------------|------------------|---------|-----------------|
| PRJEB40200 | Sole2021      | ERS5094861       | Spain   | Liver cirrhosis |
| PRJEB40200 | Sole2021      | ERS5094862       | Spain   | Liver cirrhosis |
| PRJEB40200 | Sole2021      | ERS5094863       | Spain   | Liver cirrhosis |
| PRJEB40200 | Sole2021      | ERS5094864       | Spain   | Liver cirrhosis |
| PRJEB40200 | Sole2021      | ERS5094865       | Spain   | Liver cirrhosis |
| PRJEB40200 | Sole2021      | ERS5094866       | Spain   | Liver cirrhosis |
| PRJEB40200 | Sole2021      | ERS5094867       | Spain   | Liver cirrhosis |
| PRJEB40200 | Sole2021      | ERS5094868       | Spain   | Liver cirrhosis |
| PRJEB40200 | Sole2021      | ERS5094869       | Spain   | Liver cirrhosis |
| PRJEB40200 | Sole2021      | ERS5094870       | Spain   | Liver cirrhosis |
| PRJEB40200 | Sole2021      | ERS5094871       | Spain   | Liver cirrhosis |
| PRJEB40200 | Sole2021      | ERS5094872       | Spain   | Liver cirrhosis |
| PRJEB40200 | Sole2021      | ERS5094873       | Spain   | Liver cirrhosis |
| PRJEB40200 | Sole2021      | ERS5094874       | Spain   | Liver cirrhosis |
| PRJEB40200 | Sole2021      | ERS5094875       | Spain   | Liver cirrhosis |
| PRJEB40200 | Sole2021      | ERS5094876       | Spain   | Liver cirrhosis |
| PRJEB40200 | Sole2021      | ERS5094877       | Spain   | Liver cirrhosis |
| PRJEB40200 | Sole2021      | ERS5094878       | Spain   | Liver cirrhosis |
| PRJEB40200 | Sole2021      | ERS5094879       | Spain   | Liver cirrhosis |
| PRJEB40200 | Sole2021      | ERS5094880       | Spain   | Liver cirrhosis |
| PRJEB40200 | Sole2021      | ERS5094881       | Spain   | Liver cirrhosis |
| PRJEB40200 | Sole2021      | ERS5094882       | Spain   | Liver cirrhosis |
| PRJEB40200 | Sole2021      | ERS5094883       | Spain   | Liver cirrhosis |
| PRJEB40200 | Sole2021      | ERS5094884       | Spain   | Liver cirrhosis |
| PRJEB40200 | Sole2021      | ERS5094885       | Spain   | Liver cirrhosis |
| PRJEB40200 | Sole2021      | ERS5094886       | Spain   | Liver cirrhosis |
| PRJEB40200 | Sole2021      | ERS5094887       | Spain   | Liver cirrhosis |
| PRJEB40200 | Sole2021      | ERS5094888       | Spain   | Liver cirrhosis |
| PRJEB40200 | Sole2021      | ERS5094889       | Spain   | Liver cirrhosis |
| PRJEB40200 | Sole2021      | ERS5094890       | Spain   | Liver cirrhosis |
| PRJEB40200 | Sole2021      | ERS5094891       | Spain   | Liver cirrhosis |
| PRJEB40200 | Sole2021      | ERS5094892       | Spain   | Liver cirrhosis |
| PRJEB40200 | Sole2021      | ERS5094893       | Spain   | Liver cirrhosis |
| PRJEB40200 | Sole2021      | ERS5094894       | Spain   | Liver cirrhosis |
| PRJEB40200 | Sole2021      | ERS5094895       | Spain   | Liver cirrhosis |
| PRJEB40200 | Sole2021      | ERS5094896       | Spain   | NA              |
| PRJEB40200 | Sole2021      | ERS5094897       | Spain   | Liver cirrhosis |
| PRJEB40200 | Sole2021      | ERS5094898       | Spain   | NA              |
| PRJEB40200 | Sole2021      | ERS5094899       | Spain   | Liver cirrhosis |
| PRJEB40200 | Sole2021      | ERS5094900       | Spain   | Liver cirrhosis |
| PRJEB40200 | Sole2021      | ERS5094901       | Spain   | NA              |
| PRJEB40200 | Sole2021      | ERS5094902       | Spain   | Liver cirrhosis |
| PRJEB40200 | Sole2021      | ERS5094903       | Spain   | Liver cirrhosis |
| PRJEB40200 | Sole2021      | ERS5094904       | Spain   | Liver cirrhosis |
| PRJEB40200 | Sole2021      | ERS5094905       | Spain   | Liver cirrhosis |
| PRJEB40200 | Sole2021      | ERS5094906       | Spain   | Liver cirrhosis |
| PRJEB40200 | Sole2021      | ERS5094907       | Spain   | Liver cirrhosis |
| PRJEB40200 | Sole2021      | ERS5094908       | Spain   | Liver cirrhosis |
| PRJEB40200 | Sole2021      | ERS5094909       | Spain   | Liver cirrhosis |

[illegible]

[illegible]

|            |                 |            |       |                 |
|------------|-----------------|------------|-------|-----------------|
| PRJEB40200 | Sole2021        | ERS5095010 | Spain | Liver cirrhosis |
| PRJEB40200 | Sole2021        | ERS5095011 | Spain | Liver cirrhosis |
| PRJEB40200 | Sole2021        | ERS5095012 | Spain | Liver cirrhosis |
| PRJEB40200 | Sole2021        | ERS5095013 | Spain | Liver cirrhosis |
| PRJEB40200 | Sole2021        | ERS5095014 | Spain | Liver cirrhosis |
| PRJEB40200 | Sole2021        | ERS5095015 | Spain | Liver cirrhosis |
| PRJEB40200 | Sole2021        | ERS5095016 | Spain | Liver cirrhosis |
| PRJEB40200 | Sole2021        | ERS5095017 | Spain | Liver cirrhosis |
| PRJEB40200 | Sole2021        | ERS5095018 | Spain | Liver cirrhosis |
| PRJEB40200 | Sole2021        | ERS5095019 | Spain | Liver cirrhosis |
| PRJEB40200 | Sole2021        | ERS5095020 | Spain | Liver cirrhosis |
| PRJEB40200 | Sole2021        | ERS5095021 | Spain | Liver cirrhosis |
| PRJEB40200 | Sole2021        | ERS5095022 | Spain | Liver cirrhosis |
| PRJEB40200 | Sole2021        | ERS5095023 | Spain | Liver cirrhosis |
| PRJEB40200 | Sole2021        | ERS5095024 | Spain | Liver cirrhosis |
| PRJEB40200 | Sole2021        | ERS5095025 | Spain | Liver cirrhosis |
| PRJEB40200 | Sole2021        | ERS5095026 | Spain | Liver cirrhosis |
| PRJEB40200 | Sole2021        | ERS5095027 | Spain | Liver cirrhosis |
| PRJEB40200 | Sole2021        | ERS5095028 | Spain | Liver cirrhosis |
| PRJEB40200 | Sole2021        | ERS5095029 | Spain | Liver cirrhosis |
| PRJEB40200 | Sole2021        | ERS5095030 | Spain | Liver cirrhosis |
| PRJEB40200 | Sole2021        | ERS5095031 | Spain | Liver cirrhosis |
| PRJEB40200 | Sole2021        | ERS5095032 | Spain | Liver cirrhosis |
| PRJEB40200 | Sole2021        | ERS5095033 | Spain | Liver cirrhosis |
| PRJEB40200 | Sole2021        | ERS5095034 | Spain | Liver cirrhosis |
| PRJEB40200 | Sole2021        | ERS5095035 | Spain | Liver cirrhosis |
| PRJEB40200 | Sole2021        | ERS5095036 | Spain | Liver cirrhosis |
| PRJEB40200 | Sole2021        | ERS5095037 | Spain | Liver cirrhosis |
| PRJEB40200 | Sole2021        | ERS5095038 | Spain | Liver cirrhosis |
| PRJEB40200 | Sole2021        | ERS5095039 | Spain | Liver cirrhosis |
| PRJEB40200 | Sole2021        | ERS5095040 | Spain | Liver cirrhosis |
| PRJEB40200 | Sole2021        | ERS5095041 | Spain | Liver cirrhosis |
| PRJEB40200 | Sole2021        | ERS5095042 | Spain | Liver cirrhosis |
| PRJEB1220  | metaHIT_healthy | ERS199287  | Spain | Healthy         |
| PRJEB1220  | metaHIT_healthy | ERS199292  | Spain | Healthy         |
| PRJEB1220  | metaHIT_healthy | ERS199297  | Spain | Healthy         |
| PRJEB1220  | metaHIT_healthy | ERS199302  | Spain | Healthy         |
| PRJEB1220  | metaHIT_healthy | ERS199305  | Spain | Healthy         |
| PRJEB1220  | metaHIT_healthy | ERS199306  | Spain | Healthy         |
| PRJEB1220  | metaHIT_healthy | ERS199309  | Spain | Healthy         |
| PRJEB5224  | metaHIT_healthy | ERS396454  | Spain | Healthy         |
| PRJEB5224  | metaHIT_healthy | ERS396463  | Spain | Healthy         |
| PRJEB5224  | metaHIT_healthy | ERS396471  | Spain | Healthy         |
| PRJEB5224  | metaHIT_healthy | ERS396472  | Spain | Healthy         |
| PRJEB5224  | metaHIT_healthy | ERS396474  | Spain | Healthy         |
| PRJEB5224  | metaHIT_healthy | ERS396477  | Spain | Healthy         |
| PRJEB5224  | metaHIT_healthy | ERS396480  | Spain | Healthy         |
| PRJEB5224  | metaHIT_healthy | ERS396481  | Spain | Healthy         |
| PRJEB5224  | metaHIT_healthy | ERS396484  | Spain | Healthy         |
| PRJEB5224  | metaHIT_healthy | ERS396487  | Spain | Healthy         |

|           |                 |           |       |         |
|-----------|-----------------|-----------|-------|---------|
| PRJEB5224 | metaHIT_healthy | ERS396488 | Spain | Healthy |
| PRJEB5224 | metaHIT_healthy | ERS396489 | Spain | Healthy |
| PRJEB5224 | metaHIT_healthy | ERS396491 | Spain | Healthy |
| PRJEB5224 | metaHIT_healthy | ERS396492 | Spain | Healthy |
| PRJEB5224 | metaHIT_healthy | ERS396493 | Spain | Healthy |
| PRJEB5224 | metaHIT_healthy | ERS396494 | Spain | Healthy |
| PRJEB5224 | metaHIT_healthy | ERS396495 | Spain | Healthy |
| PRJEB5224 | metaHIT_healthy | ERS396496 | Spain | Healthy |
| PRJEB5224 | metaHIT_healthy | ERS396497 | Spain | Healthy |
| PRJEB5224 | metaHIT_healthy | ERS396498 | Spain | Healthy |
| PRJEB5224 | metaHIT_healthy | ERS396499 | Spain | Healthy |
| PRJEB5224 | metaHIT_healthy | ERS396501 | Spain | Healthy |
| PRJEB5224 | metaHIT_healthy | ERS396505 | Spain | Healthy |
| PRJEB5224 | metaHIT_healthy | ERS396506 | Spain | Healthy |
| PRJEB5224 | metaHIT_healthy | ERS396507 | Spain | Healthy |
| PRJEB5224 | metaHIT_healthy | ERS396511 | Spain | Healthy |
| PRJEB5224 | metaHIT_healthy | ERS396519 | Spain | Healthy |
| PRJEB5224 | metaHIT_healthy | ERS396520 | Spain | Healthy |
| PRJEB5224 | metaHIT_healthy | ERS396521 | Spain | Healthy |
| PRJEB5224 | metaHIT_healthy | ERS396522 | Spain | Healthy |
| PRJEB5224 | metaHIT_healthy | ERS396526 | Spain | Healthy |

| subgroup      | num_reads_subsampled | ae_seq_coverage | excluded |
|---------------|----------------------|-----------------|----------|
| AD            | 5M single-end        |                 | 0 FALSE  |
| AD            | 5M single-end        |                 | 0 FALSE  |
| ACLF          | 5M single-end        |                 | 0 FALSE  |
| AD            | 5M single-end        |                 | 0 FALSE  |
| ACLF          | 5M single-end        |                 | 0 FALSE  |
| ACLF          | 5M single-end        |                 | 0 FALSE  |
| AD            | 5M single-end        |                 | 0 FALSE  |
| AD            | 5M single-end        | 0.024304942     | FALSE    |
| AD            | 5M single-end        |                 | 0 FALSE  |
| ACLF          | 5M single-end        | 0.009466423     | TRUE     |
| AD            | 5M single-end        |                 | 0 FALSE  |
| AD            | 5M single-end        |                 | 0 FALSE  |
| AD            | 5M single-end        |                 | 0 FALSE  |
| AD            | 5M single-end        |                 | 0 FALSE  |
| ACLF          | 5M single-end        |                 | 0 FALSE  |
| ACLF          | 5M single-end        |                 | 0 FALSE  |
| AD            | 5M single-end        |                 | 0 FALSE  |
| AD            | 5M single-end        |                 | 0 FALSE  |
| AD            | 5M single-end        |                 | 0 FALSE  |
| ACLF          | 5M single-end        |                 | 0 FALSE  |
| AD            | 5M single-end        |                 | 0 FALSE  |
| ACLF          | 5M single-end        |                 | 0 FALSE  |
| ACLF          | 5M single-end        |                 | 0 FALSE  |
| AD            | 5M single-end        |                 | 0 FALSE  |
| AD            | 5M single-end        |                 | 0 FALSE  |
| AD            | 5M single-end        |                 | 0 FALSE  |
| ACLF          | 5M single-end        | 0.030351603     | FALSE    |
| AD            | 5M single-end        |                 | 0 FALSE  |
| ACLF          | 5M single-end        |                 | 0 FALSE  |
| AD            | 5M single-end        |                 | 0 FALSE  |
| ACLF          | 5M single-end        |                 | 0 FALSE  |
| AD            | 5M single-end        |                 | 0 FALSE  |
| ACLF          | 5M single-end        |                 | 0 FALSE  |
| ACLF          | 5M single-end        |                 | 0 FALSE  |
| ACLF          | 5M single-end        |                 | 0 TRUE   |
| NA            | 5M single-end        |                 | 0 TRUE   |
| ACLF          | 5M single-end        | 0.036754714     | FALSE    |
| NA            | 5M single-end        |                 | 0 TRUE   |
| ACLF          | 5M single-end        |                 | 0 FALSE  |
| AD            | 5M single-end        |                 | 0 FALSE  |
| NA            | 5M single-end        |                 | 0 TRUE   |
| ACLF          | 5M single-end        |                 | 0 TRUE   |
| AD            | 5M single-end        |                 | 0 FALSE  |
| AD            | 5M single-end        |                 | 0 FALSE  |
| AD            | 5M single-end        |                 | 0 FALSE  |
| ACLF          | 5M single-end        |                 | 0 FALSE  |
| AD            | 5M single-end        |                 | 0 FALSE  |
| AD            | 5M single-end        |                 | 0 FALSE  |
| Decompensated | 5M single-end        |                 | 0 FALSE  |

|               |               |             |       |
|---------------|---------------|-------------|-------|
| ACLF          | 5M single-end | 0           | FALSE |
| AD            | 5M single-end | 0           | FALSE |
| Decompensated | 5M single-end | 0           | FALSE |
| AD            | 5M single-end | 0           | FALSE |
| ACLF          | 5M single-end | 0           | FALSE |
| NA            | 5M single-end | 0           | TRUE  |
| ACLF          | 5M single-end | 0           | FALSE |
| AD            | 5M single-end | 0           | FALSE |
| ACLF          | 5M single-end | 0           | FALSE |
| Decompensated | 5M single-end | 0           | FALSE |
| AD            | 5M single-end | 0           | FALSE |
| AD            | 5M single-end | 0           | FALSE |
| AD            | 5M single-end | 0           | FALSE |
| Decompensated | 5M single-end | 0           | FALSE |
| AD            | 5M single-end | 0           | FALSE |
| AD            | 5M single-end | 0           | FALSE |
| NA            | 5M single-end | 0           | TRUE  |
| Compensated   | 5M single-end | 0           | FALSE |
| ACLF          | 5M single-end | 0.012795278 | FALSE |
| AD            | 5M single-end | 0           | FALSE |
| AD            | 5M single-end | 0           | FALSE |
| AD            | 5M single-end | 0           | FALSE |
| AD            | 5M single-end | 0           | FALSE |
| Compensated   | 5M single-end | 0           | FALSE |
| Compensated   | 5M single-end | 0.005996966 | FALSE |
| AD            | 5M single-end | 0           | FALSE |
| AD            | 5M single-end | 0           | FALSE |
| AD            | 5M single-end | 0           | FALSE |
| AD            | 5M single-end | 0           | FALSE |
| NA            | 5M single-end | 0           | TRUE  |
| Compensated   | 5M single-end | 0.028443755 | FALSE |
| AD            | 5M single-end | 0           | FALSE |
| AD            | 5M single-end | 0           | FALSE |
| AD            | 5M single-end | 0           | FALSE |
| NA            | 5M single-end | 0           | TRUE  |
| ACLF          | 5M single-end | 0           | FALSE |
| Compensated   | 5M single-end | 0.018784722 | FALSE |
| Compensated   | 5M single-end | 0           | FALSE |
| Compensated   | 5M single-end | 0.049518182 | FALSE |
| AD            | 5M single-end | 0           | FALSE |
| AD            | 5M single-end | 0           | FALSE |
| AD            | 5M single-end | 0           | FALSE |
| AD            | 5M single-end | 0           | FALSE |
| Decompensated | 5M single-end | 0.063269025 | FALSE |
| AD            | 5M single-end | 0           | FALSE |
| AD            | 5M single-end | 0.005928984 | FALSE |
| ACLF          | 5M single-end | 0           | FALSE |
| AD            | 5M single-end | 0           | FALSE |
| AD            | 5M single-end | 0           | FALSE |
| ACLF          | 5M single-end | 0           | FALSE |

|               |               |             |       |
|---------------|---------------|-------------|-------|
| AD            | 5M single-end | 0           | FALSE |
| NA            | 5M single-end | 0           | TRUE  |
| NA            | 5M single-end | 0           | TRUE  |
| NA            | 5M single-end | 0           | TRUE  |
| AD            | 5M single-end | 0           | FALSE |
| ACLF          | 5M single-end | 0           | FALSE |
| Compensated   | 5M single-end | 0           | FALSE |
| ACLF          | 5M single-end | 0           | FALSE |
| AD            | 5M single-end | 0           | FALSE |
| Decompensated | 5M single-end | 0           | FALSE |
| Compensated   | 5M single-end | 0           | FALSE |
| ACLF          | 5M single-end | 0           | FALSE |
| Compensated   | 5M single-end | 0.005669134 | FALSE |
| Compensated   | 5M single-end | 0.17558608  | FALSE |
| Compensated   | 5M single-end | 0.075831    | FALSE |
| ACLF          | 5M single-end | 0           | FALSE |
| ACLF          | 5M single-end | 0           | FALSE |
| Compensated   | 5M single-end | 0           | FALSE |
| AD            | 5M single-end | 0           | FALSE |
| ACLF          | 5M single-end | 0           | FALSE |
| ACLF          | 5M single-end | 0           | FALSE |
| Decompensated | 5M single-end | 0           | FALSE |
| AD            | 5M single-end | 0           | FALSE |
| NA            | 5M single-end | 0           | TRUE  |
| Compensated   | 5M single-end | 0           | FALSE |
| AD            | 5M single-end | 0           | FALSE |
| Compensated   | 5M single-end | 0           | FALSE |
| ACLF          | 5M single-end | 0           | FALSE |
| ACLF          | 5M single-end | 0           | FALSE |
| Compensated   | 5M single-end | 0.012888593 | FALSE |
| ACLF          | 5M single-end | 0           | FALSE |
| AD            | 5M single-end | 0           | FALSE |
| AD            | 5M single-end | 0           | FALSE |
| AD            | 5M single-end | 0           | FALSE |
| AD            | 5M single-end | 0           | FALSE |
| AD            | 5M single-end | 0           | FALSE |
| ACLF          | 5M single-end | 0           | FALSE |
| ACLF          | 5M single-end | 0           | FALSE |
| AD            | 5M single-end | 0           | FALSE |
| Compensated   | 5M single-end | 0.025814718 | FALSE |
| AD            | 5M single-end | 0           | FALSE |
| ACLF          | 5M single-end | 0           | FALSE |
| AD            | 5M single-end | 0           | FALSE |
| AD            | 5M single-end | 0.038411826 | FALSE |
| ACLF          | 5M single-end | 0           | FALSE |
| Compensated   | 5M single-end | 0.007886866 | FALSE |
| AD            | 5M single-end | 0           | FALSE |
| ACLF          | 5M single-end | 0           | FALSE |
| ACLF          | 5M single-end | 0           | FALSE |
| AD            | 5M single-end | 0           | FALSE |



|               |               |             |       |
|---------------|---------------|-------------|-------|
| Compensated   | 5M single-end | 0.014951246 | FALSE |
| AD            | 5M single-end | 0           | FALSE |
| ACLF          | 5M single-end | 0           | FALSE |
| AD            | 5M single-end | 0           | FALSE |
| AD            | 5M single-end | 0           | FALSE |
| AD            | 5M single-end | 0           | FALSE |
| AD            | 5M single-end | 0           | FALSE |
| ACLF          | 5M single-end | 0           | FALSE |
| AD            | 5M single-end | 0           | FALSE |
| Compensated   | 5M single-end | 0           | FALSE |
| ACLF          | 5M single-end | 0           | FALSE |
| ACLF          | 5M single-end | 0           | TRUE  |
| ACLF          | 5M single-end | 0           | FALSE |
| AD            | 5M single-end | 0           | FALSE |
| AD            | 5M single-end | 0           | FALSE |
| ACLF          | 5M single-end | 0           | FALSE |
| AD            | 5M single-end | 0           | FALSE |
| AD            | 5M single-end | 0           | FALSE |
| AD            | 5M single-end | 0           | FALSE |
| Decompensated | 5M single-end | 0           | FALSE |
| ACLF          | 5M single-end | 0           | FALSE |
| ACLF          | 5M single-end | 0           | FALSE |
| ACLF          | 5M single-end | 0           | FALSE |
| Compensated   | 5M single-end | 0           | FALSE |
| Compensated   | 5M single-end | 0.037527817 | FALSE |
| Compensated   | 5M single-end | 0.031748117 | FALSE |
| ACLF          | 5M single-end | 0           | FALSE |
| AD            | 5M single-end | 0           | FALSE |
| AD            | 5M single-end | 0           | FALSE |
| Compensated   | 5M single-end | 0.081342586 | FALSE |
| ACLF          | 5M single-end | 0           | TRUE  |
| AD            | 5M single-end | 0           | FALSE |
| ACLF          | 5M single-end | 0           | FALSE |
| Healthy       | 5M forward    | 0.040860152 | FALSE |
| Healthy       | 5M forward    | 0.047602798 | FALSE |
| Healthy       | 5M forward    | 0.023133052 | FALSE |
| Healthy       | 5M forward    | 0.022732023 | FALSE |
| Healthy       | 5M forward    | 0.386144728 | FALSE |
| Healthy       | 5M forward    | 0.118583195 | FALSE |
| Healthy       | 5M forward    | 0.038744248 | FALSE |
| Healthy       | 5M forward    | 0.177429063 | FALSE |
| Healthy       | 5M forward    | 0           | FALSE |
| Healthy       | 5M forward    | 0.036089776 | FALSE |
| Healthy       | 5M forward    | 0.102672709 | FALSE |
| Healthy       | 5M forward    | 0.949208853 | FALSE |
| Healthy       | 5M forward    | 0.052067391 | FALSE |
| Healthy       | 5M forward    | 0           | FALSE |
| Healthy       | 5M forward    | 0.006685773 | FALSE |
| Healthy       | 5M forward    | 0.117576666 | FALSE |
| Healthy       | 5M forward    | 0.486163108 | FALSE |

|         |            |                   |
|---------|------------|-------------------|
| Healthy | 5M forward | 0.114549098 FALSE |
| Healthy | 5M forward | 0 FALSE           |
| Healthy | 5M forward | 0.042550775 FALSE |
| Healthy | 5M forward | 0.025163454 FALSE |
| Healthy | 5M forward | 0.005457262 FALSE |
| Healthy | 5M forward | 0.029311285 FALSE |
| Healthy | 5M forward | 0.311344567 FALSE |
| Healthy | 5M forward | 0.425585515 FALSE |
| Healthy | 5M forward | 0.401577561 FALSE |
| Healthy | 5M forward | 0.294458219 FALSE |
| Healthy | 5M forward | 0 FALSE           |
| Healthy | 5M forward | 0 FALSE           |
| Healthy | 5M forward | 0 FALSE           |
| Healthy | 5M forward | 0.166553694 FALSE |
| Healthy | 5M forward | 0.049885329 FALSE |
| Healthy | 5M forward | 1.186016124 FALSE |
| Healthy | 5M forward | 0 FALSE           |
| Healthy | 5M forward | 0 FALSE           |
| Healthy | 5M forward | 0 FALSE           |
| Healthy | 5M forward | 0.015768296 FALSE |
| Healthy | 5M forward | 0 FALSE           |

excluded\_reason

NA

NA

NA

NA

NA

NA

NA

NA

NA

too few reads (<5M)

NA

too few reads (<5M)

not in final paper

NA

not in final paper

NA

NA

not in final paper

too few reads (<5M)

NA

NA

NA

NA

NA

NA

NA

NA





[illegible]
