# Supplementary material for: Adlercreutzia equolifaciens Is an Anti-Inflammatory Commensal Bacterium with Decreased Abundance in Gut Microbiota of Patients with Metabolic Liver Disease
Source: MDPI journal article supplement (doi:10.3390/ijms241512232), 2023-07-31
Supplement: s1 [file s1]

| genome           | strain_name | type_strain                    |
|------------------|-------------|--------------------------------|
| GCA_000478885.1  | DSM 19450   | A. equolifaciens               |
| GCA_003340305.1  | AP38TSA     | NA                             |
| GCA_003340325.1  | OB21 GAM 11 | NA                             |
| GCA_003726015.1  | DSM 18785   | A. equolifaciens subsp. celata |
| GCA_009755265.1  | ResAG-91    | A. rubneri                     |
| GCA_009874275.1  | IPLA 37004  | NA                             |
| GCA_011405655.1  | 8CFCBH1     | A. hattorii                    |
| GCA_019972915.1  | 9CBH6       | NA                             |
| GCA_020558135.1  | DFI.6.48    | NA                             |
| GCA_020558765.1  | DFI.6.17    | NA                             |
| GQMETA001__bin27 | NA          | NA                             |
| GQMETA003__bin33 | NA          | NA                             |
| GQMETA005__bin9  | NA          | NA                             |
| GQMETA007__bin11 | NA          | NA                             |
| GQMETA008__bin6  | NA          | NA                             |
| GQMETA009__bin58 | NA          | NA                             |
| GQMETA013__bin64 | NA          | NA                             |
| GQMETA014__bin51 | NA          | NA                             |
| GQMETA015__bin4  | NA          | NA                             |
| GQMETA022__bin30 | NA          | NA                             |
| KIJ_genome_10569 | NA          | NA                             |
| KIJ_genome_11351 | NA          | NA                             |
| KIJ_genome_11574 | NA          | NA                             |
| KIJ_genome_1164  | NA          | NA                             |
| KIJ_genome_12238 | NA          | NA                             |
| KIJ_genome_13042 | NA          | NA                             |
| KIJ_genome_13108 | NA          | NA                             |
| KIJ_genome_13390 | NA          | NA                             |
| KIJ_genome_14511 | NA          | NA                             |
| KIJ_genome_15205 | NA          | NA                             |
| KIJ_genome_17204 | NA          | NA                             |
| KIJ_genome_17994 | NA          | NA                             |
| KIJ_genome_21695 | NA          | NA                             |
| KIJ_genome_22290 | NA          | NA                             |
| KIJ_genome_22472 | NA          | NA                             |
| KIJ_genome_23407 | NA          | NA                             |
| KIJ_genome_24013 | NA          | NA                             |
| KIJ_genome_26228 | NA          | NA                             |
| KIJ_genome_26654 | NA          | NA                             |
| KIJ_genome_27667 | NA          | NA                             |
| KIJ_genome_28457 | NA          | NA                             |
| KIJ_genome_4837  | NA          | NA                             |
| KIJ_genome_8242  | NA          | NA                             |
| KIJ_genome_9020  | NA          | NA                             |
| MGYG000005721    | NA          | NA                             |
| MGYG000010812    | NA          | NA                             |
| MGYG000015385    | NA          | NA                             |
| MGYG000016365    | NA          | NA                             |
| MGYG000016689    | NA          | NA                             |

|               |    |    |
|---------------|----|----|
| MGYG000021096 | NA | NA |
| MGYG000021129 | NA | NA |
| MGYG000022820 | NA | NA |
| MGYG000030398 | NA | NA |
| MGYG000031484 | NA | NA |
| MGYG000032609 | NA | NA |
| MGYG000033842 | NA | NA |
| MGYG000036067 | NA | NA |
| MGYG000041415 | NA | NA |
| MGYG000043062 | NA | NA |
| MGYG000043227 | NA | NA |
| MGYG000043885 | NA | NA |
| MGYG000045548 | NA | NA |
| MGYG000046430 | NA | NA |
| MGYG000046605 | NA | NA |
| MGYG000046947 | NA | NA |
| MGYG000049827 | NA | NA |
| MGYG000051073 | NA | NA |
| MGYG000051727 | NA | NA |
| MGYG000059492 | NA | NA |
| MGYG000060550 | NA | NA |
| MGYG000062517 | NA | NA |
| MGYG000065661 | NA | NA |
| MGYG000066056 | NA | NA |
| MGYG000067395 | NA | NA |
| MGYG000070014 | NA | NA |
| MGYG000072685 | NA | NA |
| MGYG000073743 | NA | NA |
| MGYG000075978 | NA | NA |
| MGYG000082178 | NA | NA |
| MGYG000084960 | NA | NA |
| MGYG000087282 | NA | NA |
| MGYG000091339 | NA | NA |
| MGYG000091960 | NA | NA |
| MGYG000095904 | NA | NA |
| MGYG000096506 | NA | NA |
| MGYG000107138 | NA | NA |
| MGYG000107923 | NA | NA |
| MGYG000107988 | NA | NA |
| MGYG000112200 | NA | NA |
| MGYG000115793 | NA | NA |
| MGYG000121696 | NA | NA |
| MGYG000123661 | NA | NA |
| MGYG000124516 | NA | NA |
| MGYG000125545 | NA | NA |
| MGYG000132293 | NA | NA |
| MGYG000132762 | NA | NA |
| MGYG000133263 | NA | NA |
| MGYG000134655 | NA | NA |
| MGYG000134986 | NA | NA |

|               |    |    |
|---------------|----|----|
| MGYG000136236 | NA | NA |
| MGYG000137194 | NA | NA |
| MGYG000137724 | NA | NA |
| MGYG000140808 | NA | NA |
| MGYG000141626 | NA | NA |
| MGYG000142272 | NA | NA |
| MGYG000144083 | NA | NA |
| MGYG000144498 | NA | NA |
| MGYG000146735 | NA | NA |
| MGYG000147783 | NA | NA |
| MGYG000149235 | NA | NA |
| MGYG000149630 | NA | NA |
| MGYG000150330 | NA | NA |
| MGYG000152534 | NA | NA |
| MGYG000154092 | NA | NA |
| MGYG000160907 | NA | NA |
| MGYG000161021 | NA | NA |
| MGYG000162202 | NA | NA |
| MGYG000167880 | NA | NA |
| MGYG000171534 | NA | NA |
| MGYG000172855 | NA | NA |
| MGYG000174936 | NA | NA |
| MGYG000176472 | NA | NA |
| MGYG000176710 | NA | NA |
| MGYG000177285 | NA | NA |
| MGYG000179418 | NA | NA |
| MGYG000180489 | NA | NA |
| MGYG000181441 | NA | NA |
| MGYG000183110 | NA | NA |
| MGYG000186974 | NA | NA |
| MGYG000187137 | NA | NA |
| MGYG000188202 | NA | NA |
| MGYG000194594 | NA | NA |
| MGYG000197899 | NA | NA |
| MGYG000197928 | NA | NA |
| MGYG000199374 | NA | NA |
| MGYG000200427 | NA | NA |
| MGYG000206403 | NA | NA |
| MGYG000206592 | NA | NA |
| MGYG000208363 | NA | NA |
| MGYG000209627 | NA | NA |
| MGYG000214551 | NA | NA |
| MGYG000215673 | NA | NA |
| MGYG000217540 | NA | NA |
| MGYG000219951 | NA | NA |
| MGYG000220359 | NA | NA |
| MGYG000221000 | NA | NA |
| MGYG000224111 | NA | NA |
| MGYG000225128 | NA | NA |
| MGYG000228296 | NA | NA |

|               |           |    |
|---------------|-----------|----|
| MGYG000230854 | NA        | NA |
| MGYG000232433 | NA        | NA |
| MGYG000235688 | NA        | NA |
| MGYG000235892 | NA        | NA |
| MGYG000237278 | NA        | NA |
| MGYG000245042 | NA        | NA |
| MGYG000245104 | NA        | NA |
| MGYG000248542 | NA        | NA |
| MGYG000249190 | NA        | NA |
| MGYG000262012 | NA        | NA |
| MGYG000266689 | NA        | NA |
| MGYG000277795 | NA        | NA |
| MGYG000284421 | NA        | NA |
| MGYG000284493 | NA        | NA |
| MGYG000287348 | NA        | NA |
| SRS254664     | UC1_BHI_P | NA |

| source                | genome_type | country        | continent     | host              |
|-----------------------|-------------|----------------|---------------|-------------------|
| GenBank               | Isolate     | Japan          | Asia          | Homo sapiens      |
| GenBank               | Isolate     | Spain          | Europe        | Homo sapiens      |
| GenBank               | Isolate     | Canada         | North America | Homo sapiens      |
| GenBank               | Isolate     | Japan          | Asia          | Rattus norvegicus |
| GenBank               | Isolate     | Germany        | Europe        | Homo sapiens      |
| GenBank               | Isolate     | Spain          | Europe        | Homo sapiens      |
| GenBank               | Isolate     | Japan          | Asia          | Homo sapiens      |
| GenBank               | Isolate     | Japan          | Asia          | Homo sapiens      |
| GenBank               | Isolate     | United States  | North America | Homo sapiens      |
| GenBank               | Isolate     | United States  | North America | Homo sapiens      |
| MIMIC2_PlazaOnate2021 | MAG         | Canada         | North America | Mus musculus      |
| MIMIC2_PlazaOnate2021 | MAG         | Canada         | North America | Mus musculus      |
| MIMIC2_PlazaOnate2021 | MAG         | Canada         | North America | Mus musculus      |
| MIMIC2_PlazaOnate2021 | MAG         | Canada         | North America | Mus musculus      |
| MIMIC2_PlazaOnate2021 | MAG         | Canada         | North America | Mus musculus      |
| MIMIC2_PlazaOnate2021 | MAG         | Canada         | North America | Mus musculus      |
| MIMIC2_PlazaOnate2021 | MAG         | Canada         | North America | Mus musculus      |
| MIMIC2_PlazaOnate2021 | MAG         | Canada         | North America | Mus musculus      |
| MIMIC2_PlazaOnate2021 | MAG         | Canada         | North America | Mus musculus      |
| MIMIC2_PlazaOnate2021 | MAG         | Canada         | North America | Mus musculus      |
| MIMIC2_PlazaOnate2021 | MAG         | Canada         | North America | Mus musculus      |
| HRGM_Kim2021          | MAG         | Korea          | Asia          | Homo sapiens      |
| HRGM_Kim2021          | MAG         | Korea          | Asia          | Homo sapiens      |
| HRGM_Kim2021          | MAG         | Korea          | Asia          | Homo sapiens      |
| HRGM_Kim2021          | MAG         | Korea          | Asia          | Homo sapiens      |
| HRGM_Kim2021          | MAG         | Korea          | Asia          | Homo sapiens      |
| HRGM_Kim2021          | MAG         | Japan          | Asia          | Homo sapiens      |
| HRGM_Kim2021          | MAG         | Japan          | Asia          | Homo sapiens      |
| HRGM_Kim2021          | MAG         | Korea          | Asia          | Homo sapiens      |
| HRGM_Kim2021          | MAG         | Japan          | Asia          | Homo sapiens      |
| HRGM_Kim2021          | MAG         | Korea          | Asia          | Homo sapiens      |
| HRGM_Kim2021          | MAG         | Japan          | Asia          | Homo sapiens      |
| HRGM_Kim2021          | MAG         | Korea          | Asia          | Homo sapiens      |
| HRGM_Kim2021          | MAG         | Korea          | Asia          | Homo sapiens      |
| HRGM_Kim2021          | MAG         | Korea          | Asia          | Homo sapiens      |
| HRGM_Kim2021          | MAG         | Korea          | Asia          | Homo sapiens      |
| HRGM_Kim2021          | MAG         | Korea          | Asia          | Homo sapiens      |
| HRGM_Kim2021          | MAG         | Korea          | Asia          | Homo sapiens      |
| HRGM_Kim2021          | MAG         | Korea          | Asia          | Homo sapiens      |
| HRGM_Kim2021          | MAG         | Korea          | Asia          | Homo sapiens      |
| HRGM_Kim2021          | MAG         | Korea          | Asia          | Homo sapiens      |
| HRGM_Kim2021          | MAG         | Korea          | Asia          | Homo sapiens      |
| HRGM_Kim2021          | MAG         | Korea          | Asia          | Homo sapiens      |
| HRGM_Kim2021          | MAG         | Korea          | Asia          | Homo sapiens      |
| HRGM_Kim2021          | MAG         | Korea          | Asia          | Homo sapiens      |
| HRGM_Kim2021          | MAG         | Korea          | Asia          | Homo sapiens      |
| HRGM_Kim2021          | MAG         | Korea          | Asia          | Homo sapiens      |
| HRGM_Kim2021          | MAG         | Korea          | Asia          | Homo sapiens      |
| UHGG_v2               | MAG         | China          | Asia          | Homo sapiens      |
| UHGG_v2               | MAG         | China          | Asia          | Homo sapiens      |
| UHGG_v2               | MAG         | China          | Asia          | Homo sapiens      |
| UHGG_v2               | MAG         | United States  | North America | Homo sapiens      |
| UHGG_v2               | MAG         | United Kingdom | Europe        | Homo sapiens      |

|         |     |                |               |              |
|---------|-----|----------------|---------------|--------------|
| UHGG_v2 | MAG | Austria        | Europe        | Homo sapiens |
| UHGG_v2 | MAG | Austria        | Europe        | Homo sapiens |
| UHGG_v2 | MAG | Sweden         | Europe        | Homo sapiens |
| UHGG_v2 | MAG | Austria        | Europe        | Homo sapiens |
| UHGG_v2 | MAG | Denmark        | Europe        | Homo sapiens |
| UHGG_v2 | MAG | China          | Asia          | Homo sapiens |
| UHGG_v2 | MAG | United Kingdom | Europe        | Homo sapiens |
| UHGG_v2 | MAG | Austria        | Europe        | Homo sapiens |
| UHGG_v2 | MAG | Austria        | Europe        | Homo sapiens |
| UHGG_v2 | MAG | Austria        | Europe        | Homo sapiens |
| UHGG_v2 | MAG | United States  | North America | Homo sapiens |
| UHGG_v2 | MAG | Austria        | Europe        | Homo sapiens |
| UHGG_v2 | MAG | Austria        | Europe        | Homo sapiens |
| UHGG_v2 | MAG | Kazakhstan     | Asia          | Homo sapiens |
| UHGG_v2 | MAG | France         | Europe        | Homo sapiens |
| UHGG_v2 | MAG | Austria        | Europe        | Homo sapiens |
| UHGG_v2 | MAG | Austria        | Europe        | Homo sapiens |
| UHGG_v2 | MAG | Austria        | Europe        | Homo sapiens |
| UHGG_v2 | MAG | Austria        | Europe        | Homo sapiens |
| UHGG_v2 | MAG | Austria        | Europe        | Homo sapiens |
| UHGG_v2 | MAG | Austria        | Europe        | Homo sapiens |
| UHGG_v2 | MAG | Canada         | North America | Homo sapiens |
| UHGG_v2 | MAG | Spain          | Europe        | Homo sapiens |
| UHGG_v2 | MAG | Kazakhstan     | Asia          | Homo sapiens |
| UHGG_v2 | MAG | United States  | North America | Homo sapiens |
| UHGG_v2 | MAG | Canada         | North America | Homo sapiens |
| UHGG_v2 | MAG | Austria        | Europe        | Homo sapiens |
| UHGG_v2 | MAG | Spain          | Europe        | Homo sapiens |
| UHGG_v2 | MAG | Spain          | Europe        | Homo sapiens |
| UHGG_v2 | MAG | China          | Asia          | Homo sapiens |
| UHGG_v2 | MAG | Spain          | Europe        | Homo sapiens |
| UHGG_v2 | MAG | Netherlands    | Europe        | Homo sapiens |
| UHGG_v2 | MAG | Austria        | Europe        | Homo sapiens |
| UHGG_v2 | MAG | Denmark        | Europe        | Homo sapiens |
| UHGG_v2 | MAG | China          | Asia          | Homo sapiens |
| UHGG_v2 | MAG | China          | Asia          | Homo sapiens |
| UHGG_v2 | MAG | United Kingdom | Europe        | Homo sapiens |
| UHGG_v2 | MAG | Austria        | Europe        | Homo sapiens |
| UHGG_v2 | MAG | Austria        | Europe        | Homo sapiens |
| UHGG_v2 | MAG | France         | Europe        | Homo sapiens |
| UHGG_v2 | MAG | United States  | North America | Homo sapiens |
| UHGG_v2 | MAG | Austria        | Europe        | Homo sapiens |
| UHGG_v2 | MAG | China          | Asia          | Homo sapiens |
| UHGG_v2 | MAG | Austria        | Europe        | Homo sapiens |
| UHGG_v2 | MAG | Mongolia       | Asia          | Homo sapiens |
| UHGG_v2 | MAG | Austria        | Europe        | Homo sapiens |
| UHGG_v2 | MAG | China          | Asia          | Homo sapiens |
| UHGG_v2 | MAG | Austria        | Europe        | Homo sapiens |
| UHGG_v2 | MAG | Mongolia       | Asia          | Homo sapiens |
| UHGG_v2 | MAG | China          | Asia          | Homo sapiens |

|         |     |                |               |              |
|---------|-----|----------------|---------------|--------------|
| UHGG_v2 | MAG | Austria        | Europe        | Homo sapiens |
| UHGG_v2 | MAG | Austria        | Europe        | Homo sapiens |
| UHGG_v2 | MAG | China          | Asia          | Homo sapiens |
| UHGG_v2 | MAG | China          | Asia          | Homo sapiens |
| UHGG_v2 | MAG | Germany        | Europe        | Homo sapiens |
| UHGG_v2 | MAG | Spain          | Europe        | Homo sapiens |
| UHGG_v2 | MAG | China          | Asia          | Homo sapiens |
| UHGG_v2 | MAG | United States  | North America | Homo sapiens |
| UHGG_v2 | MAG | Spain          | Europe        | Homo sapiens |
| UHGG_v2 | MAG | China          | Asia          | Homo sapiens |
| UHGG_v2 | MAG | Austria        | Europe        | Homo sapiens |
| UHGG_v2 | MAG | Austria        | Europe        | Homo sapiens |
| UHGG_v2 | MAG | Austria        | Europe        | Homo sapiens |
| UHGG_v2 | MAG | Fiji           | Oceania       | Homo sapiens |
| UHGG_v2 | MAG | Austria        | Europe        | Homo sapiens |
| UHGG_v2 | MAG | Germany        | Europe        | Homo sapiens |
| UHGG_v2 | MAG | China          | Asia          | Homo sapiens |
| UHGG_v2 | MAG | Germany        | Europe        | Homo sapiens |
| UHGG_v2 | MAG | Spain          | Europe        | Homo sapiens |
| UHGG_v2 | MAG | Austria        | Europe        | Homo sapiens |
| UHGG_v2 | MAG | United States  | North America | Homo sapiens |
| UHGG_v2 | MAG | Austria        | Europe        | Homo sapiens |
| UHGG_v2 | MAG | Austria        | Europe        | Homo sapiens |
| UHGG_v2 | MAG | Austria        | Europe        | Homo sapiens |
| UHGG_v2 | MAG | United Kingdom | Europe        | Homo sapiens |
| UHGG_v2 | MAG | Austria        | Europe        | Homo sapiens |
| UHGG_v2 | MAG | Austria        | Europe        | Homo sapiens |
| UHGG_v2 | MAG | Sweden         | Europe        | Homo sapiens |
| UHGG_v2 | MAG | Denmark        | Europe        | Homo sapiens |
| UHGG_v2 | MAG | Austria        | Europe        | Homo sapiens |
| UHGG_v2 | MAG | Netherlands    | Europe        | Homo sapiens |
| UHGG_v2 | MAG | United States  | North America | Homo sapiens |
| UHGG_v2 | MAG | China          | Asia          | Homo sapiens |
| UHGG_v2 | MAG | Sweden         | Europe        | Homo sapiens |
| UHGG_v2 | MAG | Austria        | Europe        | Homo sapiens |
| UHGG_v2 | MAG | Austria        | Europe        | Homo sapiens |
| UHGG_v2 | MAG | Fiji           | Oceania       | Homo sapiens |
| UHGG_v2 | MAG | Austria        | Europe        | Homo sapiens |
| UHGG_v2 | MAG | Netherlands    | Europe        | Homo sapiens |
| UHGG_v2 | MAG | Austria        | Europe        | Homo sapiens |
| UHGG_v2 | MAG | Austria        | Europe        | Homo sapiens |
| UHGG_v2 | MAG | Austria        | Europe        | Homo sapiens |
| UHGG_v2 | MAG | Austria        | Europe        | Homo sapiens |
| UHGG_v2 | MAG | Mongolia       | Asia          | Homo sapiens |
| UHGG_v2 | MAG | Austria        | Europe        | Homo sapiens |
| UHGG_v2 | MAG | Austria        | Europe        | Homo sapiens |
| UHGG_v2 | MAG | Austria        | Europe        | Homo sapiens |
| UHGG_v2 | MAG | United States  | North America | Homo sapiens |
| UHGG_v2 | MAG | Germany        | Europe        | Homo sapiens |
| UHGG_v2 | MAG | United States  | North America | Homo sapiens |

|         |         |               |               |              |
|---------|---------|---------------|---------------|--------------|
| UHGG_v2 | MAG     | Austria       | Europe        | Homo sapiens |
| UHGG_v2 | MAG     | Denmark       | Europe        | Homo sapiens |
| UHGG_v2 | MAG     | Spain         | Europe        | Homo sapiens |
| UHGG_v2 | MAG     | Austria       | Europe        | Homo sapiens |
| UHGG_v2 | MAG     | Spain         | Europe        | Homo sapiens |
| UHGG_v2 | MAG     | Germany       | Europe        | Homo sapiens |
| UHGG_v2 | MAG     | Austria       | Europe        | Homo sapiens |
| UHGG_v2 | MAG     | Germany       | Europe        | Homo sapiens |
| UHGG_v2 | MAG     | Sweden        | Europe        | Homo sapiens |
| UHGG_v2 | MAG     | Austria       | Europe        | Homo sapiens |
| UHGG_v2 | MAG     | Austria       | Europe        | Homo sapiens |
| UHGG_v2 | MAG     | Austria       | Europe        | Homo sapiens |
| UHGG_v2 | MAG     | China         | Asia          | Homo sapiens |
| UHGG_v2 | MAG     | Austria       | Europe        | Homo sapiens |
| UHGG_v2 | MAG     | Austria       | Europe        | Homo sapiens |
| INSDC   | Isolate | United States | North America | Homo sapiens |



| genome_size | n50     | checkm.completeness | checkm.contamination | checkm2.completeness |
|-------------|---------|---------------------|----------------------|----------------------|
| 2862526     | 2862526 | 100                 | 0.81                 | 100                  |
| 2822848     | 154931  | 100                 | 0.81                 | 99.97                |
| 2680191     | 75477   | 100                 | 0.2                  | 99.92                |
| 2894143     | 134918  | 100                 | 0.2                  | 99.98                |
| 2798076     | 107842  | 100                 | 0                    | 99.94                |
| 2663312     | 101827  | 100                 | 1.57                 | 99.94                |
| 2908404     | 2908404 | 100                 | 1.08                 | 99.96                |
| 2858962     | 158258  | 100                 | 0.81                 | 99.99                |
| 2770157     | 238322  | 100                 | 0.81                 | 99.99                |
| 2772040     | 238322  | 100                 | 0.81                 | 99.98                |
| 2351795     | 23044   | 87.39               | 0                    | 85.96                |
| 2313964     | 25036   | 92.64               | 1.29                 | 91.69                |
| 2326720     | 38465   | 96.03               | 0                    | 90.86                |
| 2237378     | 21514   | 88.9                | 0                    | 85.92                |
| 2073019     | 21295   | 87.97               | 0.4                  | 82.34                |
| 2366085     | 44774   | 93.79               | 0                    | 90.44                |
| 2284572     | 18603   | 92.81               | 0.08                 | 89.51                |
| 2450832     | 22968   | 94.45               | 0.4                  | 92.1                 |
| 2485781     | 44578   | 96.04               | 1.32                 | 96.39                |
| 2400078     | 22565   | 90.9                | 4.84                 | 85.13                |
| 2956078     | 88190   | 98.39               | 0.87                 | 100                  |
| 2618273     | 152541  | 94.01               | 3.23                 | 90.87                |
| 2493351     | 60401   | 96.77               | 0.4                  | 96.76                |
| 2714898     | 69138   | 100                 | 1.61                 | 99.95                |
| 2326135     | 40352   | 90.05               | 0.81                 | 85.13                |
| 2342244     | 9112    | 89.64               | 1.61                 | 87.35                |
| 2231731     | 5586    | 80.12               | 0.87                 | 80.03                |
| 2719679     | 46404   | 97.98               | 0.48                 | 99.8                 |
| 2040301     | 5548    | 85.61               | 0                    | 80.31                |
| 2494585     | 104415  | 95.18               | 0                    | 93.97                |
| 2600980     | 15836   | 91.53               | 1.81                 | 91.15                |
| 2418995     | 10179   | 94.51               | 0.27                 | 94.11                |
| 2596888     | 96504   | 95.09               | 0                    | 96.84                |
| 2572458     | 37805   | 98.17               | 0.81                 | 91.73                |
| 2486894     | 7484    | 90.13               | 1.48                 | 85.31                |
| 2463072     | 43919   | 90.84               | 0.55                 | 90.04                |
| 2554927     | 18568   | 95.18               | 1.34                 | 92.71                |
| 2324957     | 11826   | 88.46               | 0.81                 | 85.59                |
| 2622555     | 110246  | 100                 | 0.81                 | 99.85                |
| 2792348     | 87230   | 93.55               | 0.92                 | 97.96                |
| 2527531     | 44170   | 92.14               | 0                    | 93.26                |
| 2469438     | 16367   | 94.51               | 0.89                 | 86.91                |
| 2483152     | 67387   | 95.94               | 0                    | 90.75                |
| 2597550     | 98790   | 97.4                | 0.81                 | 99.4                 |
| 2655325     | 75010   | 100                 | 0                    | 98.92                |
| 2547605     | 13860   | 93.15               | 3.23                 | 90.95                |
| 2475285     | 54391   | 90.32               | 3.3                  | 84.07                |
| 2376415     | 8640    | 91.89               | 0.68                 | 87.57                |
| 2581661     | 92818   | 95.05               | 0.81                 | 97.89                |

|         |        |       |      |       |
|---------|--------|-------|------|-------|
| 2322224 | 11742  | 81.72 | 3.16 | 82.42 |
| 2621133 | 37096  | 96.26 | 0.81 | 95.38 |
| 2387144 | 5960   | 78.02 | 2.42 | 80.2  |
| 2415362 | 15843  | 85.02 | 1.77 | 82.07 |
| 2652437 | 18080  | 97.31 | 1.21 | 93.13 |
| 2585849 | 18505  | 94.56 | 0.07 | 97.85 |
| 2393517 | 17689  | 91.05 | 0.27 | 84.88 |
| 2444720 | 33532  | 94.24 | 0.56 | 94.2  |
| 2231108 | 10115  | 89.08 | 0    | 83.28 |
| 2484183 | 6366   | 83.26 | 2.64 | 85.73 |
| 2563605 | 75538  | 96.98 | 0    | 98.66 |
| 2400610 | 39498  | 85.37 | 1.01 | 84.97 |
| 2446085 | 21530  | 98.19 | 0.75 | 92.92 |
| 2521866 | 9655   | 92.17 | 1.64 | 88.87 |
| 2335194 | 7635   | 88.43 | 3.5  | 80.89 |
| 2572991 | 8853   | 92.06 | 3.19 | 82.33 |
| 2464027 | 8925   | 92.49 | 4.48 | 86.05 |
| 2274341 | 15447  | 73.43 | 0.67 | 81.15 |
| 2596906 | 28665  | 93.3  | 0.81 | 90.53 |
| 2469967 | 52025  | 94.72 | 0    | 91.96 |
| 2551423 | 19179  | 95.16 | 0.56 | 94.56 |
| 2670125 | 81203  | 97.58 | 0    | 96.67 |
| 2234281 | 9350   | 86.3  | 0.88 | 81.09 |
| 2602144 | 45853  | 98.79 | 0.81 | 99.04 |
| 2444514 | 6038   | 87.84 | 1.82 | 82.54 |
| 2287457 | 7329   | 91.77 | 3.09 | 87.02 |
| 2349183 | 25343  | 97.42 | 0.81 | 88.5  |
| 2268509 | 89074  | 86.29 | 1.53 | 85.62 |
| 2123864 | 13329  | 83.6  | 0.07 | 81.63 |
| 2460276 | 8723   | 87.83 | 0.81 | 85.39 |
| 2325373 | 26153  | 95.16 | 0.07 | 91.45 |
| 2205095 | 109223 | 87.9  | 0    | 84.9  |
| 2260090 | 8896   | 90.59 | 3.83 | 84.49 |
| 2205241 | 9973   | 85.15 | 3.96 | 87.66 |
| 2401893 | 9553   | 81.59 | 1.08 | 80.95 |
| 2506561 | 66842  | 98.46 | 1.77 | 95.59 |
| 2459328 | 15268  | 92.28 | 0.81 | 94.06 |
| 2625288 | 11714  | 96.36 | 1.21 | 96.42 |
| 2444784 | 19341  | 91.23 | 4.44 | 90.65 |
| 2713723 | 23700  | 98.99 | 0.07 | 94.96 |
| 2425902 | 12134  | 91.41 | 0.08 | 86.08 |
| 2379404 | 19924  | 92.74 | 0.4  | 90.86 |
| 2489907 | 101684 | 97.58 | 0    | 89.42 |
| 2458825 | 62349  | 98.39 | 0    | 93.92 |
| 2460618 | 10639  | 93.59 | 1.73 | 90.81 |
| 2533238 | 87965  | 100   | 0    | 99.99 |
| 2571630 | 44407  | 97.58 | 0    | 91.86 |
| 2523694 | 15698  | 94.26 | 3.78 | 91.7  |
| 2510135 | 7307   | 87.63 | 0.92 | 86.23 |
| 2612950 | 10237  | 87.71 | 0.16 | 86.6  |

|         |       |       |      |       |
|---------|-------|-------|------|-------|
| 2225854 | 15795 | 86.69 | 0    | 82.62 |
| 2280566 | 7942  | 83.17 | 0.81 | 81.45 |
| 2419486 | 7279  | 85.7  | 3.23 | 82.74 |
| 2663037 | 7466  | 90.11 | 0    | 87.22 |
| 2582730 | 37713 | 91.67 | 2.96 | 91.94 |
| 2367007 | 50506 | 92.74 | 0    | 87.34 |
| 2283990 | 7092  | 81.75 | 2.96 | 82.5  |
| 2764061 | 72435 | 98.48 | 0.93 | 96.64 |
| 2608361 | 45379 | 95.97 | 0.81 | 98.69 |
| 2568685 | 41887 | 95.97 | 1.08 | 93.4  |
| 2358848 | 56527 | 88.71 | 0.81 | 82.17 |
| 2386197 | 8608  | 86.17 | 0.92 | 86.86 |
| 2436780 | 43461 | 96.77 | 0    | 92.37 |
| 2423506 | 6531  | 88.94 | 3.52 | 86.71 |
| 2379297 | 7975  | 81.33 | 0    | 80.45 |
| 2408413 | 14772 | 90.53 | 2.35 | 87.31 |
| 2451826 | 17077 | 89.11 | 2.08 | 89.45 |
| 2357499 | 6517  | 83.99 | 4.15 | 85.17 |
| 2188752 | 8252  | 80.29 | 0.88 | 80.98 |
| 2300069 | 23080 | 84.86 | 2.58 | 81.74 |
| 2588456 | 17808 | 97.89 | 1.61 | 95.85 |
| 2534334 | 16543 | 90.93 | 0.16 | 92.83 |
| 2502835 | 7241  | 87.77 | 1.61 | 88.15 |
| 2416413 | 9075  | 80.88 | 1.88 | 82.03 |
| 2411565 | 19109 | 91.84 | 1.84 | 89.68 |
| 2525978 | 84047 | 94.06 | 0    | 92.37 |
| 2350210 | 9637  | 84.54 | 2.82 | 84.12 |
| 2210249 | 10337 | 75.42 | 1.81 | 80.96 |
| 2387988 | 7385  | 88.78 | 3.09 | 86.25 |
| 2383819 | 28042 | 97.58 | 1.32 | 90.91 |
| 2407557 | 10963 | 93.45 | 3.63 | 87.41 |
| 2675999 | 50462 | 97.74 | 1.61 | 96.26 |
| 2492052 | 15468 | 88.66 | 0.81 | 87.4  |
| 2283357 | 5848  | 77.84 | 0.4  | 81.49 |
| 2372224 | 19807 | 90.06 | 2.77 | 86.31 |
| 2335281 | 43749 | 88.31 | 0    | 81.04 |
| 2463686 | 10047 | 90.11 | 0.5  | 89.97 |
| 2371338 | 11486 | 84.58 | 0    | 81.46 |
| 2430220 | 10450 | 89.3  | 3.05 | 85.26 |
| 2583424 | 12021 | 90.87 | 1.73 | 89.66 |
| 2277648 | 26689 | 88.87 | 2.29 | 90.68 |
| 2474354 | 59583 | 89.52 | 1.55 | 86.64 |
| 2345628 | 13120 | 87.97 | 0    | 86.64 |
| 2472804 | 22266 | 97.98 | 0    | 99.56 |
| 2546303 | 64514 | 91.13 | 0    | 85.6  |
| 2297282 | 13104 | 75.34 | 0.81 | 83.02 |
| 2354449 | 21124 | 91.86 | 1.08 | 85.3  |
| 2348806 | 9368  | 86.04 | 3.45 | 81.65 |
| 2563161 | 20827 | 89.35 | 1.73 | 94.26 |
| 2330347 | 7716  | 85.05 | 1.21 | 84.76 |

|         |       |       |      |       |
|---------|-------|-------|------|-------|
| 2280472 | 10334 | 85.1  | 2.49 | 83.93 |
| 2477091 | 11014 | 87.37 | 3.97 | 85.89 |
| 2496788 | 59091 | 95.97 | 0    | 93.92 |
| 2185698 | 9066  | 81.13 | 0.16 | 80.48 |
| 2530411 | 15783 | 95.16 | 3.77 | 90.39 |
| 2579320 | 14776 | 89.35 | 0.92 | 89.88 |
| 2437208 | 10810 | 90.34 | 1.88 | 86.78 |
| 2608431 | 41243 | 95.22 | 1.34 | 95.15 |
| 2497156 | 10341 | 92.24 | 1.7  | 85.01 |
| 2677629 | 40639 | 94.53 | 3.09 | 90.58 |
| 2340346 | 26801 | 77.28 | 0.27 | 83.17 |
| 2316243 | 8543  | 84.76 | 2.7  | 83.88 |
| 2501675 | 81480 | 92.74 | 0    | 91.68 |
| 2507859 | 12527 | 98.64 | 1.88 | 93.73 |
| 2278642 | 8477  | 82.33 | 0.81 | 81.39 |
| 2673443 | 86137 | 100   | 0.81 | 99.99 |

checkm2.contamination

1.13  
0.58  
0.16  
0.62  
0.52  
0.08  
1.05  
1.71  
0.31  
0.26  
0.16  
4.32  
0.33  
0.18  
0.62  
0.29  
0.39  
0.22  
2.12  
3.88  
0.6  
4.58  
0.68  
4.34  
0.21  
0.34  
2.1  
1.53  
0.48  
0.47  
3.81  
0.71  
1.22  
2.77  
3.92  
2.49  
1.43  
0.62  
1.14  
1.18  
0.89  
1.06  
0.07  
0.1  
0.8  
2.24  
3.85  
2.52  
1.33

1.09  
0.56  
3.43  
2.38  
1.49  
0.47  
2.57  
0.53  
1.21  
2.42  
0.78  
1.76  
2.07  
1.2  
1.94  
2.53  
3.78  
1.6  
1.31  
1.06  
0.05  
0.72  
2.56  
3.68  
1.55  
1.39  
1.34  
2.14  
0.72  
0.84  
0.99  
0.74  
0.54  
1.83  
3.27  
0.13  
1.49  
0.2  
0.44  
2.74  
1.24  
0.9  
0.28  
0.08  
2.05  
0.31  
0.28  
3.02  
1.59  
3.56

2.97  
1.19  
2.49  
1.34  
4.13  
0.55  
3.69  
0.64  
0.85  
0.82  
0.63  
1.1  
0.28  
3.82  
2.31  
4.07  
2.07  
3.29  
2.31  
3.06  
0.63  
0.45  
0.52  
3.27  
2.14  
0.25  
1.06  
0.65  
0.15  
1.89  
1.15  
1.34  
1.37  
1.63  
2.63  
0.22  
2.89  
1.3  
4.9  
1.83  
1.61  
2.44  
0.42  
0.22  
1.34  
0.66  
0.27  
3.67  
3.71  
1.65

3.97  
2.24  
1.69  
1.69  
3.24  
1.29  
3.44  
3.96  
3.66  
0.98  
0.96  
1.63  
0.47  
3.3  
2.21  
0.23



[illegible][illegible]

[illegible]

[illegible]

[illegible]

| pass.GUNC | excluded | excluded_comment | equol_biosynthesis |
|-----------|----------|------------------|--------------------|
| TRUE      | FALSE    | NA               | TRUE               |
| TRUE      | FALSE    | NA               | FALSE              |
| TRUE      | FALSE    | NA               | FALSE              |
| TRUE      | FALSE    | NA               | TRUE               |
| TRUE      | FALSE    | NA               | FALSE              |
| TRUE      | FALSE    | NA               | FALSE              |
| TRUE      | FALSE    | NA               | FALSE              |
| TRUE      | FALSE    | NA               | TRUE               |
| TRUE      | FALSE    | NA               | FALSE              |
| TRUE      | FALSE    | NA               | FALSE              |
| TRUE      | FALSE    | NA               | TRUE               |
| TRUE      | FALSE    | NA               | TRUE               |
| TRUE      | FALSE    | NA               | TRUE               |
| TRUE      | FALSE    | NA               | TRUE               |
| TRUE      | FALSE    | NA               | TRUE               |
| TRUE      | FALSE    | NA               | FALSE              |
| TRUE      | FALSE    | NA               | TRUE               |
| TRUE      | FALSE    | NA               | TRUE               |
| TRUE      | FALSE    | NA               | TRUE               |
| TRUE      | FALSE    | NA               | TRUE               |
| TRUE      | FALSE    | NA               | TRUE               |
| TRUE      | FALSE    | NA               | TRUE               |
| TRUE      | FALSE    | NA               | TRUE               |
| TRUE      | FALSE    | NA               | FALSE              |
| TRUE      | FALSE    | NA               | FALSE              |
| TRUE      | FALSE    | NA               | TRUE               |
| TRUE      | FALSE    | NA               | FALSE              |
| TRUE      | FALSE    | NA               | TRUE               |
| TRUE      | FALSE    | NA               | FALSE              |
| TRUE      | FALSE    | NA               | FALSE              |
| TRUE      | FALSE    | NA               | TRUE               |
| TRUE      | FALSE    | NA               | TRUE               |
| TRUE      | FALSE    | NA               | TRUE               |
| TRUE      | FALSE    | NA               | FALSE              |
| TRUE      | FALSE    | NA               | FALSE              |
| FALSE     | FALSE    | NA               | FALSE              |
| TRUE      | FALSE    | NA               | FALSE              |
| TRUE      | FALSE    | NA               | TRUE               |
| TRUE      | FALSE    | NA               | TRUE               |
| TRUE      | FALSE    | NA               | TRUE               |
| TRUE      | FALSE    | NA               | FALSE              |
| TRUE      | FALSE    | NA               | FALSE              |
| TRUE      | FALSE    | NA               | TRUE               |
| TRUE      | FALSE    | NA               | TRUE               |
| TRUE      | FALSE    | NA               | TRUE               |
| FALSE     | FALSE    | NA               | FALSE              |
| TRUE      | FALSE    | NA               | FALSE              |
| TRUE      | FALSE    | NA               | TRUE               |
| TRUE      | FALSE    | NA               | TRUE               |
| FALSE     | FALSE    | NA               | TRUE               |
| TRUE      | FALSE    | NA               | FALSE              |
| TRUE      | FALSE    | NA               | FALSE              |

|       |       |    |       |
|-------|-------|----|-------|
| TRUE  | FALSE | NA | FALSE |
| TRUE  | FALSE | NA | FALSE |
| TRUE  | FALSE | NA | FALSE |
| TRUE  | FALSE | NA | FALSE |
| FALSE | FALSE | NA | FALSE |
| TRUE  | FALSE | NA | FALSE |
| TRUE  | FALSE | NA | FALSE |
| TRUE  | FALSE | NA | FALSE |
| TRUE  | FALSE | NA | FALSE |
| TRUE  | FALSE | NA | FALSE |
| TRUE  | FALSE | NA | FALSE |
| TRUE  | FALSE | NA | FALSE |
| TRUE  | FALSE | NA | FALSE |
| FALSE | FALSE | NA | FALSE |
| TRUE  | FALSE | NA | FALSE |
| FALSE | FALSE | NA | FALSE |
| FALSE | FALSE | NA | FALSE |
| TRUE  | FALSE | NA | FALSE |
| TRUE  | FALSE | NA | FALSE |
| TRUE  | FALSE | NA | FALSE |
| TRUE  | FALSE | NA | FALSE |
| TRUE  | FALSE | NA | FALSE |
| FALSE | FALSE | NA | FALSE |
| TRUE  | FALSE | NA | FALSE |
| FALSE | FALSE | NA | TRUE  |
| TRUE  | FALSE | NA | FALSE |
| TRUE  | FALSE | NA | FALSE |
| TRUE  | FALSE | NA | FALSE |
| TRUE  | FALSE | NA | FALSE |
| TRUE  | FALSE | NA | FALSE |
| TRUE  | FALSE | NA | TRUE  |
| TRUE  | FALSE | NA | FALSE |
| TRUE  | FALSE | NA | FALSE |
| FALSE | FALSE | NA | FALSE |
| TRUE  | FALSE | NA | FALSE |
| TRUE  | FALSE | NA | TRUE  |
| TRUE  | FALSE | NA | TRUE  |
| TRUE  | FALSE | NA | FALSE |
| TRUE  | FALSE | NA | FALSE |
| TRUE  | FALSE | NA | FALSE |
| TRUE  | FALSE | NA | FALSE |
| TRUE  | FALSE | NA | FALSE |
| TRUE  | FALSE | NA | FALSE |
| TRUE  | FALSE | NA | TRUE  |
| TRUE  | FALSE | NA | FALSE |
| TRUE  | FALSE | NA | TRUE  |
| TRUE  | FALSE | NA | FALSE |
| TRUE  | FALSE | NA | TRUE  |
| TRUE  | FALSE | NA | FALSE |
| TRUE  | FALSE | NA | TRUE  |
| TRUE  | FALSE | NA | TRUE  |

|       |       |    |       |
|-------|-------|----|-------|
| FALSE | FALSE | NA | FALSE |
| TRUE  | FALSE | NA | FALSE |
| TRUE  | FALSE | NA | TRUE  |
| FALSE | FALSE | NA | TRUE  |
| TRUE  | FALSE | NA | FALSE |
| FALSE | FALSE | NA | FALSE |
| FALSE | FALSE | NA | FALSE |
| TRUE  | FALSE | NA | FALSE |
| TRUE  | FALSE | NA | FALSE |
| TRUE  | FALSE | NA | TRUE  |
| TRUE  | FALSE | NA | FALSE |
| FALSE | FALSE | NA | FALSE |
| TRUE  | FALSE | NA | FALSE |
| TRUE  | FALSE | NA | TRUE  |
| TRUE  | FALSE | NA | FALSE |
| TRUE  | FALSE | NA | FALSE |
| FALSE | FALSE | NA | FALSE |
| FALSE | FALSE | NA | TRUE  |
| TRUE  | FALSE | NA | FALSE |
| TRUE  | FALSE | NA | FALSE |
| TRUE  | FALSE | NA | TRUE  |
| TRUE  | FALSE | NA | FALSE |
| TRUE  | FALSE | NA | FALSE |
| TRUE  | FALSE | NA | FALSE |
| TRUE  | FALSE | NA | FALSE |
| TRUE  | FALSE | NA | FALSE |
| FALSE | FALSE | NA | FALSE |
| FALSE | FALSE | NA | FALSE |
| TRUE  | FALSE | NA | FALSE |
| FALSE | FALSE | NA | FALSE |
| FALSE | FALSE | NA | FALSE |
| TRUE  | FALSE | NA | FALSE |
| TRUE  | FALSE | NA | FALSE |
| TRUE  | FALSE | NA | TRUE  |
| FALSE | FALSE | NA | FALSE |
| FALSE | FALSE | NA | FALSE |
| TRUE  | FALSE | NA | FALSE |
| TRUE  | FALSE | NA | FALSE |
| FALSE | FALSE | NA | FALSE |
| FALSE | FALSE | NA | FALSE |
| TRUE  | FALSE | NA | FALSE |
| TRUE  | FALSE | NA | FALSE |
| FALSE | FALSE | NA | FALSE |
| TRUE  | FALSE | NA | FALSE |
| TRUE  | FALSE | NA | FALSE |
| FALSE | FALSE | NA | FALSE |
| TRUE  | FALSE | NA | FALSE |
| TRUE  | FALSE | NA | FALSE |
| FALSE | FALSE | NA | FALSE |
| TRUE  | FALSE | NA | FALSE |
| TRUE  | FALSE | NA | FALSE |

|       |       |    |       |
|-------|-------|----|-------|
| FALSE | FALSE | NA | FALSE |
| TRUE  | FALSE | NA | FALSE |
| TRUE  | FALSE | NA | FALSE |
| TRUE  | FALSE | NA | FALSE |
| TRUE  | FALSE | NA | FALSE |
| TRUE  | FALSE | NA | FALSE |
| FALSE | FALSE | NA | FALSE |
| TRUE  | FALSE | NA | FALSE |
| TRUE  | FALSE | NA | FALSE |
| TRUE  | FALSE | NA | FALSE |
| TRUE  | FALSE | NA | FALSE |
| FALSE | FALSE | NA | FALSE |
| TRUE  | FALSE | NA | FALSE |
| FALSE | FALSE | NA | FALSE |
| FALSE | FALSE | NA | FALSE |
| TRUE  | FALSE | NA | FALSE |
